# Supplementary material for: Implications of a novel Pseudomonas species on low density polyethylene biodegradation: an in vitro to in silico approach
Source: PubMed Central journal article supplement (PMC4409612; doi:10.1186/2193-1801-3-497), 2014-09-02

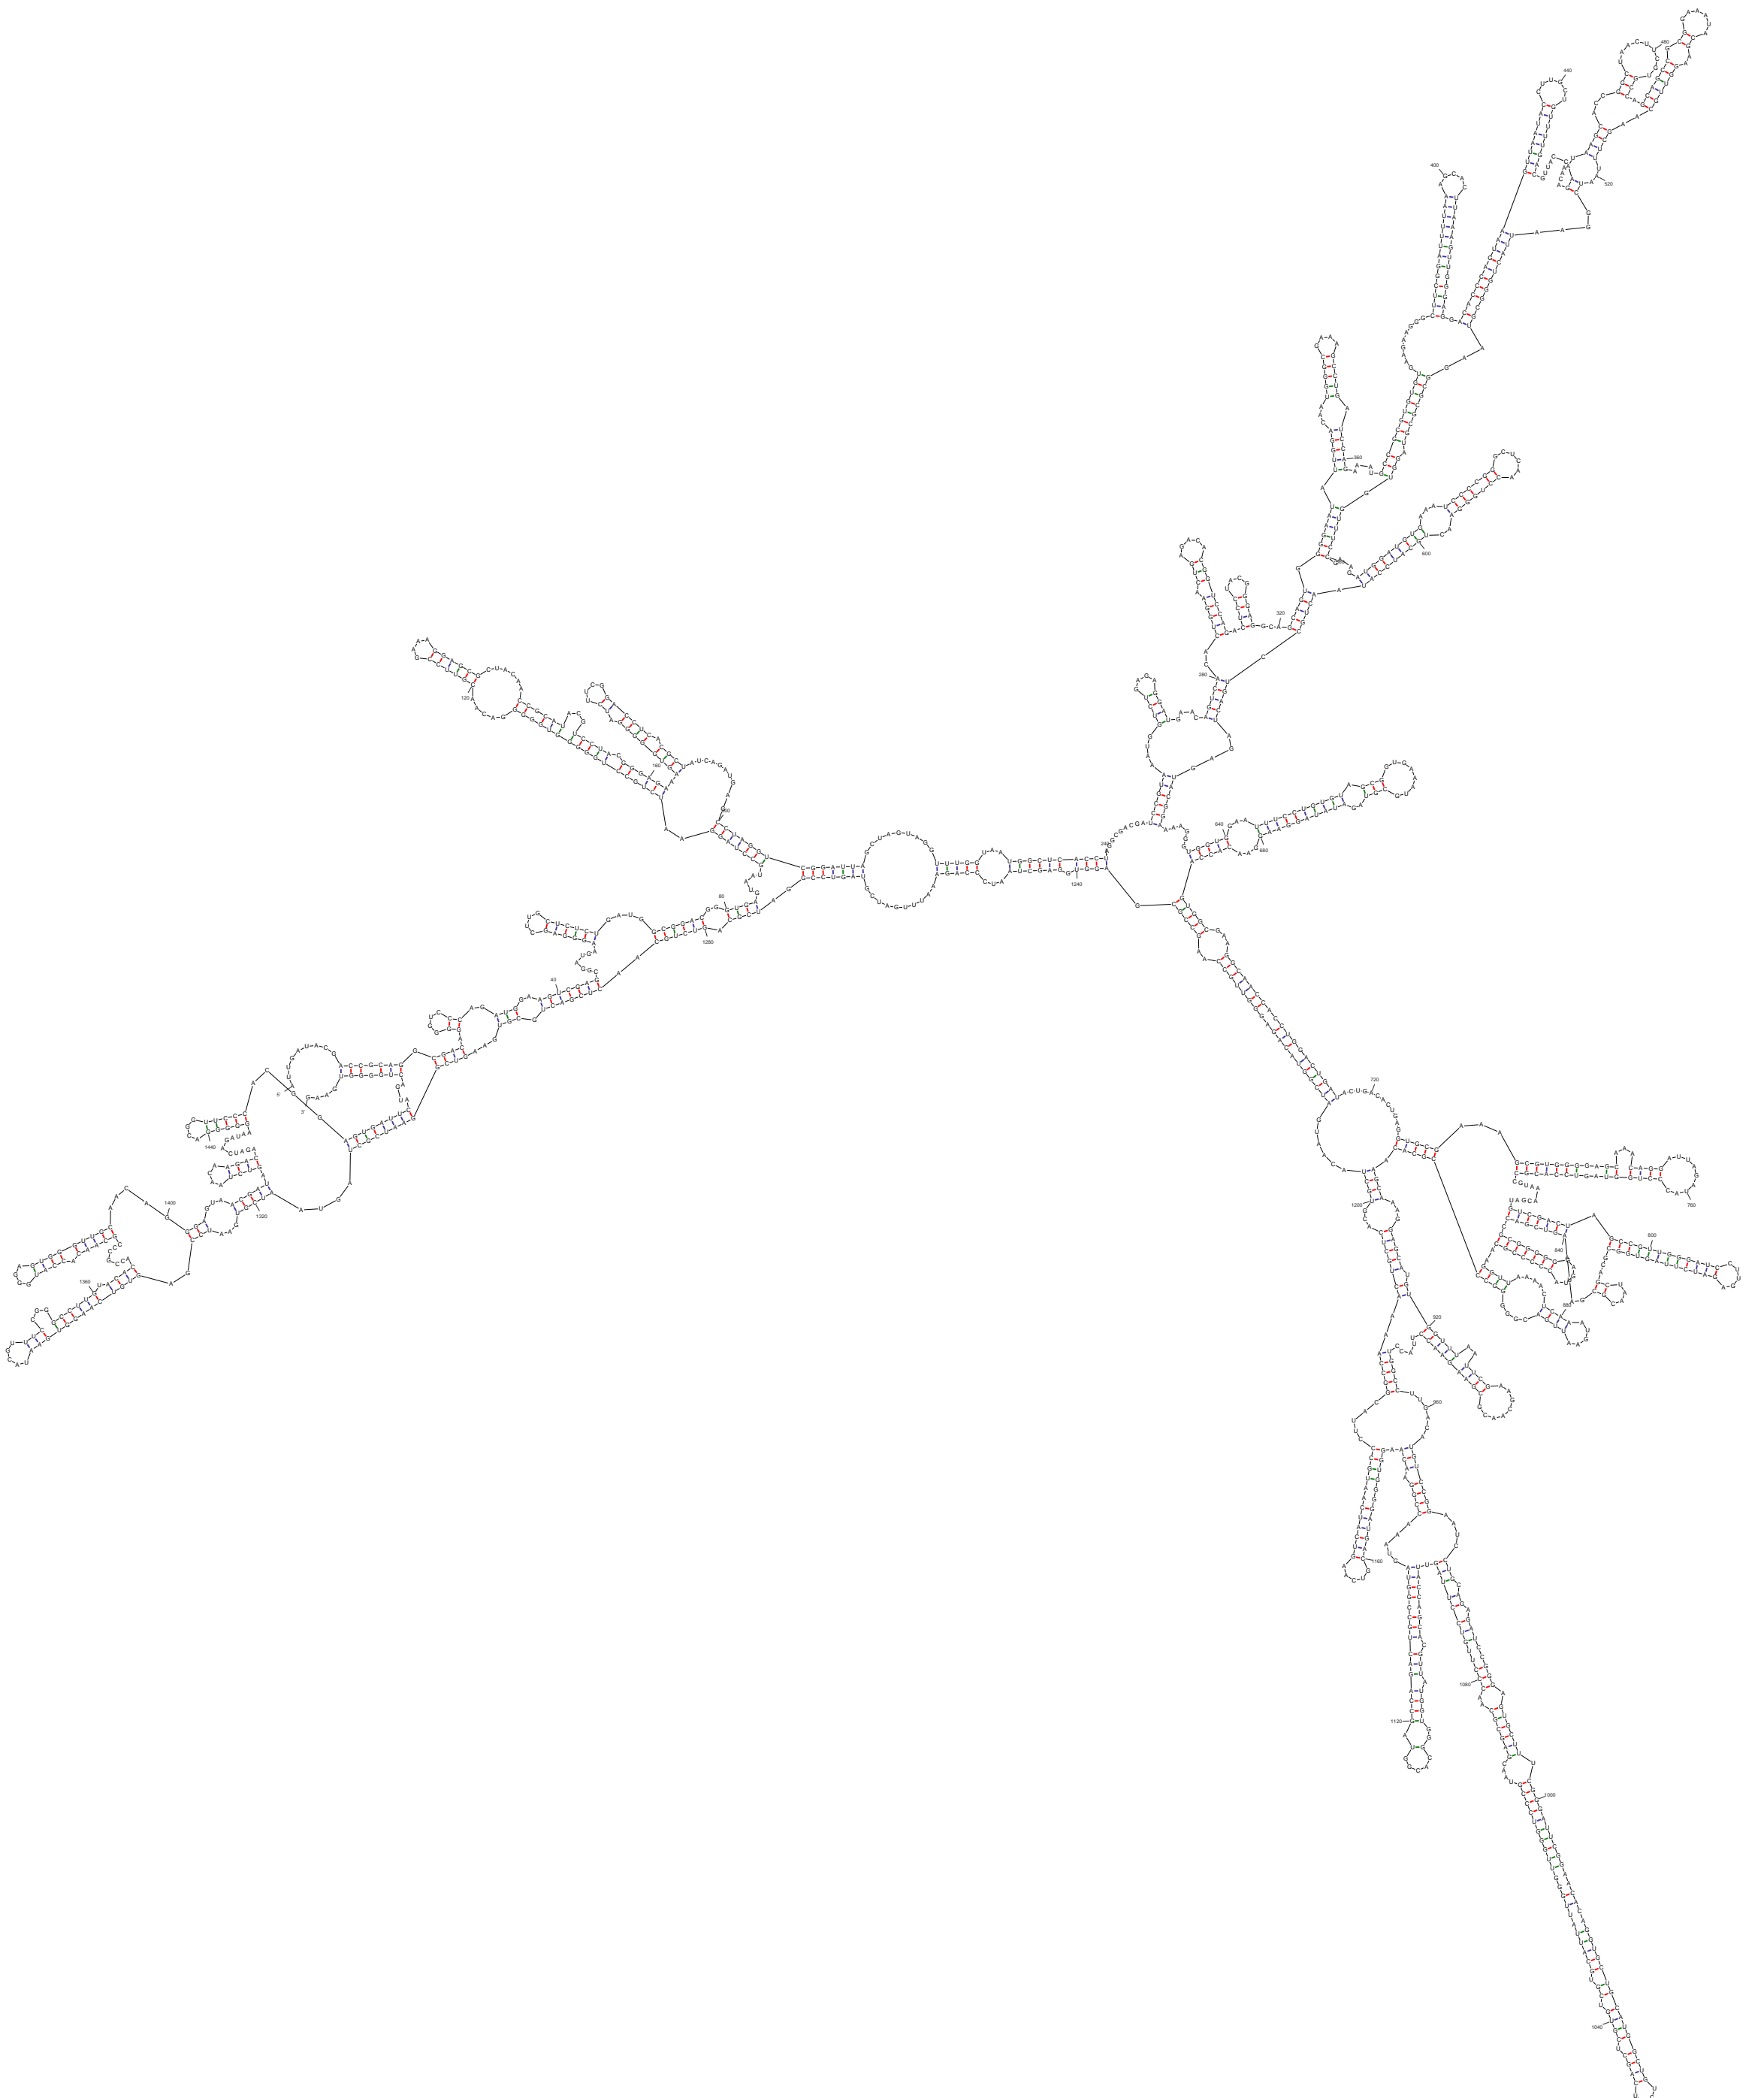

Supplement: 40064_2014_1478_MOESM1_ESM.pdf [file 40064_2014_1478_MOESM1_ESM.pdf]
